# Supplementary material for: Analysis of the Diversity of Yeast Communities in Xinjiang Honey
Source: Research Square preprint supplement (doi:10.21203/rs.3.rs-1349085/v1), 2022-03-07
Supplement: Supplementary file 1 [file 32420cdec3463ebf33047568.xlsx]

## Sheet: Sheet1
		Table 5 Maximum temperature growth experiment
		Strain number	FM1-1	FM1-2	FM1-3	FM1-4	FM1-8	FM1-10	FM1-12	FM2-10	FM3-1	FM3-3	FM3-7
		20℃	＋	＋	＋	＋	＋	＋	＋	＋	s	＋	＋
		25℃	＋	＋	＋	＋	＋	＋	＋	＋	＋	＋	＋
		30℃	＋	＋	＋	＋	＋	＋	＋	＋	＋	＋	＋
		35℃	w	＋	＋	﹣	﹣	w	w	＋	＋	w	＋
		40℃	－	－	－	﹣	﹣	﹣	﹣	﹣	﹣	﹣	﹣
		Remarks:＋= positive; - =negative; w = weak
